# Supplementary material for: Apoptotic Fragmentation of Tricellulin
Source: Int J Mol Sci. 2019 Oct 1;20(19):4882. doi: 10.3390/ijms20194882 (PMC6801678; doi:10.3390/ijms20194882)
Supplement: Supplementary file 1 [file ijms-20-04882-s001.pdf]

## Supplementary Figures

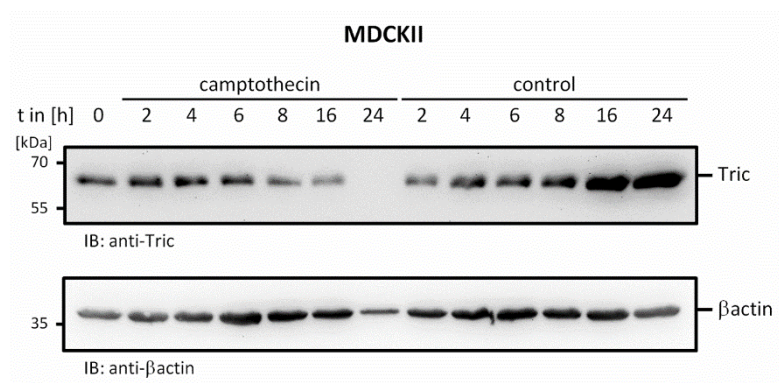

**Figure S1.** Cleavage of tricellulin after induction of apoptosis with camptothecin. MDCKII cells were treated with 5  $\mu$ M camptothecin or DMSO as a solvent control for the indicated times. Cell lysates were analyzed by Western blotting using anti-tricellulin and anti- $\beta$ -actin antibodies.

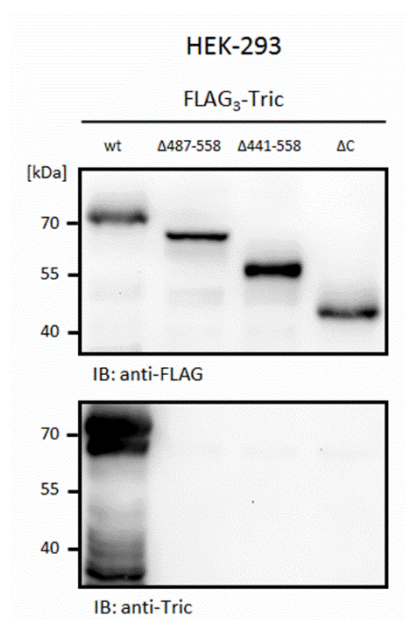

**Figure S2.** Characterization of anti-tricellulin (clone 54H19L38) ABfinity™ rabbit monoclonal antibody. Tricellulin with deleted amino acids 487–558 is no longer detectable by the anti-tricellulin antibody.
